# Supplementary material for: A unified electrocatalytic platform for the chemical–H2–electricity triad from biomass via interfacial electronic engineering
Source: Royal Society of Chemistry journal article supplement (doi:10.1039/d6sc03316d), 2026-06-04
Supplement: d6sc03316d1.pdf [file d6sc03316d1.pdf]

## Supporting Information

### **A unified electrocatalytic platform for the chemicals-H<sub>2</sub>-electricity triad from biomass via interfacial electronic engineering**

Wei Wang<sup>1</sup>, Xiaoyang He<sup>1</sup>, Shuai Dong<sup>1</sup>, Jianying Wang<sup>1</sup>, Deli Wu<sup>2</sup>, Zuofeng Chen<sup>1,\*</sup>

<sup>1</sup>School of Chemical Science and Engineering, Tongji University, 1239 Siping Road, Shanghai 200092, China;

<sup>2</sup>State Key Laboratory of Pollution Control and Resources Reuse, College of Environmental Science & Engineering, Tongji University, 1239 Siping Road, Shanghai 200092, China.

E-mail: zfchen@tongji.edu.cn (Z. F. Chen)

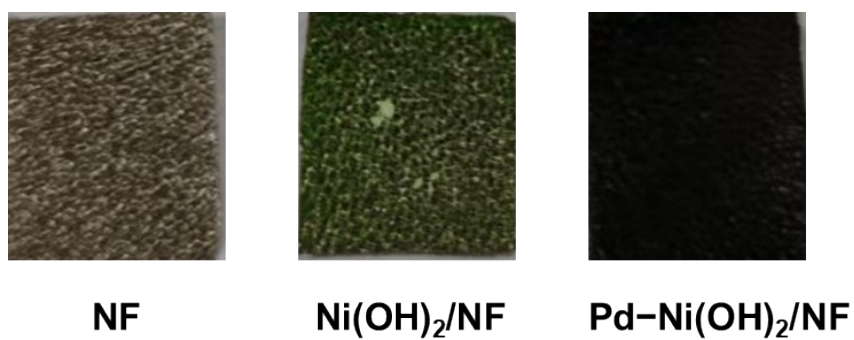

**Figure S1.** Optical photographs of the pristine NF, Ni(OH)<sub>2</sub>/NF and Pd-Ni(OH)<sub>2</sub>/NF.

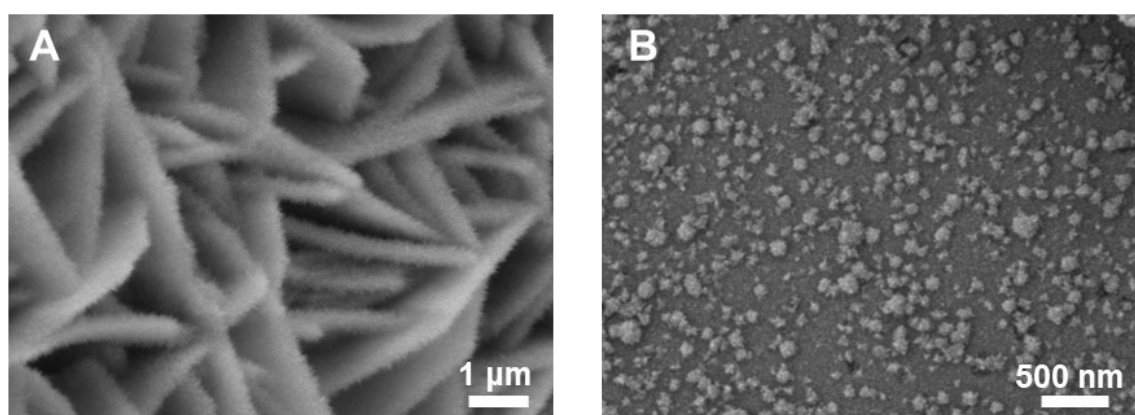

**Figure S2.** SEM images of the as-prepared (A) Ni(OH)<sub>2</sub>/NF and (B) Pd/NF.

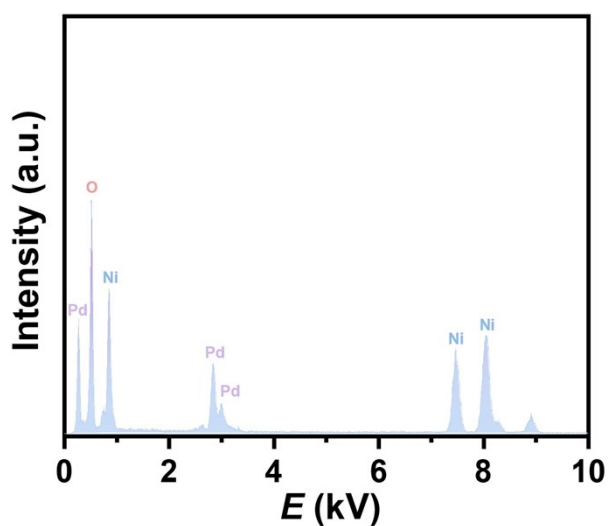

**Figure S3.** TEM-EDS of the nanosheet material scrapped from Pd-Ni(OH)<sub>2</sub>/NF electrode.

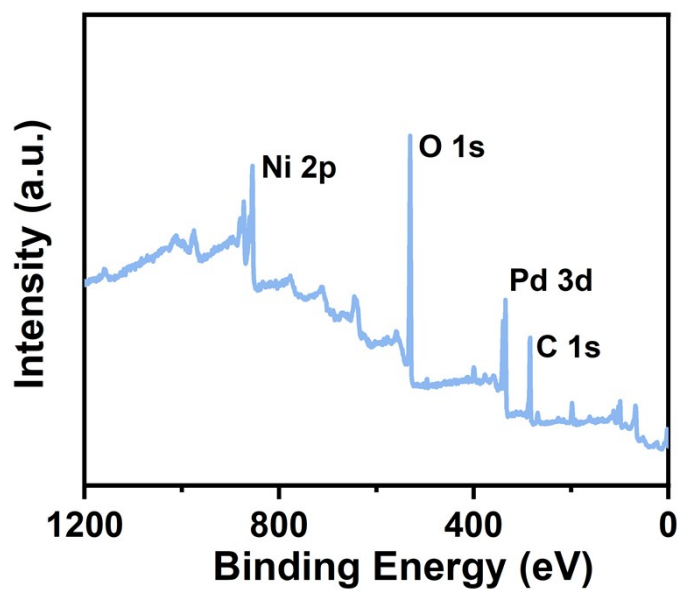

**Figure S4.** Survey XPS spectrum of the Pd-Ni(OH)<sub>2</sub>/NF.

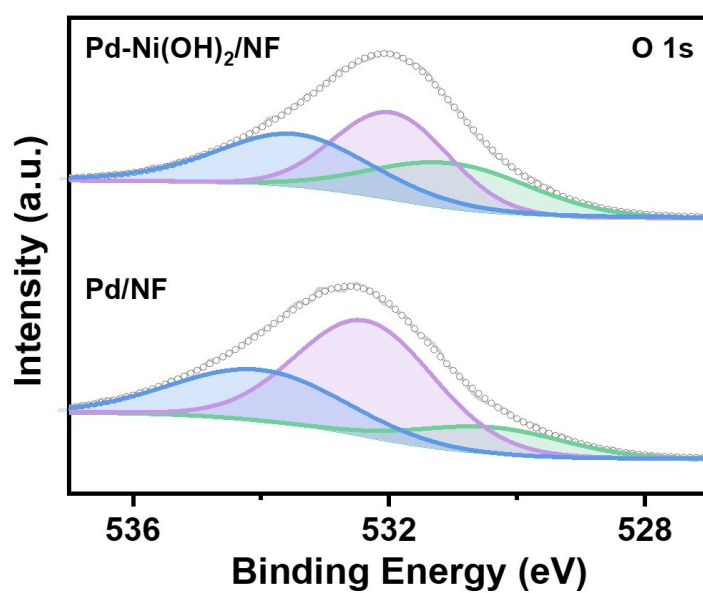

**Figure S5.** XPS spectra of O 1s on the different electrodes.

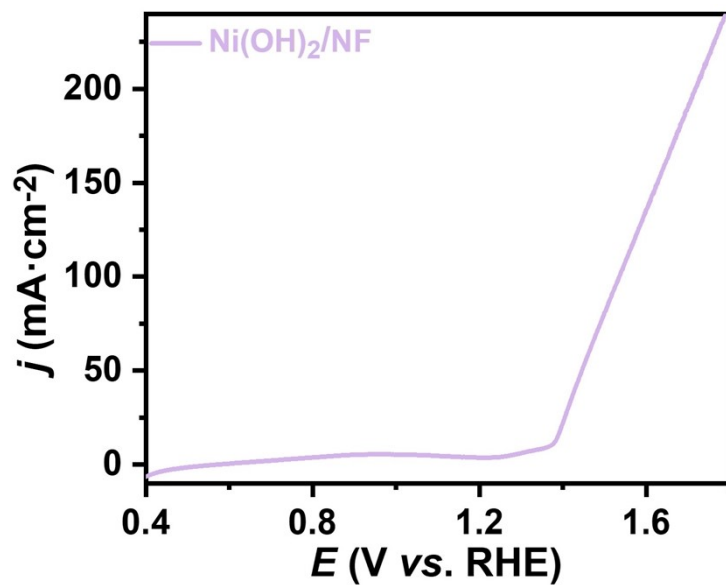

**Figure S6.** LSV curve of Ni(OH)<sub>2</sub>/NF electrode in 1 M KOH with 0.1 M 1,3-PDO.

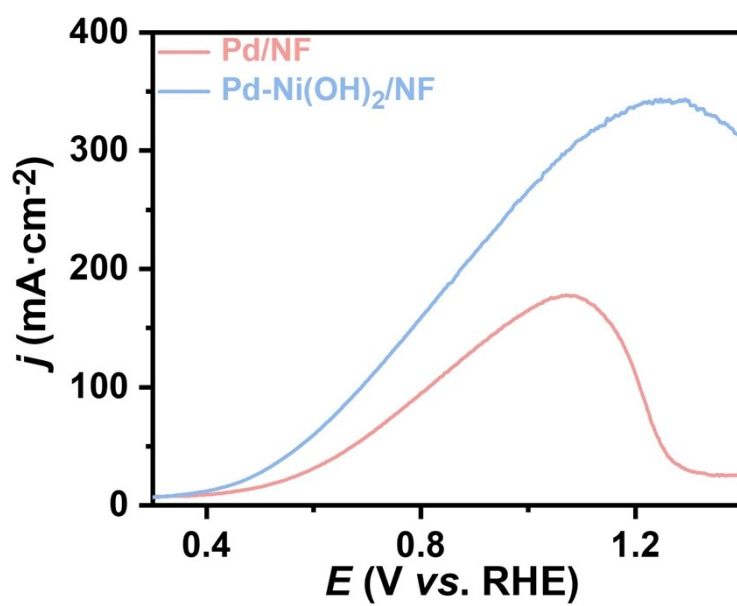

**Figure S7.** LSV curves of Pd-Ni(OH)<sub>2</sub>/NF and Pd/NF electrodes in 1 M KOH with 0.1 M 1,3-PDO.

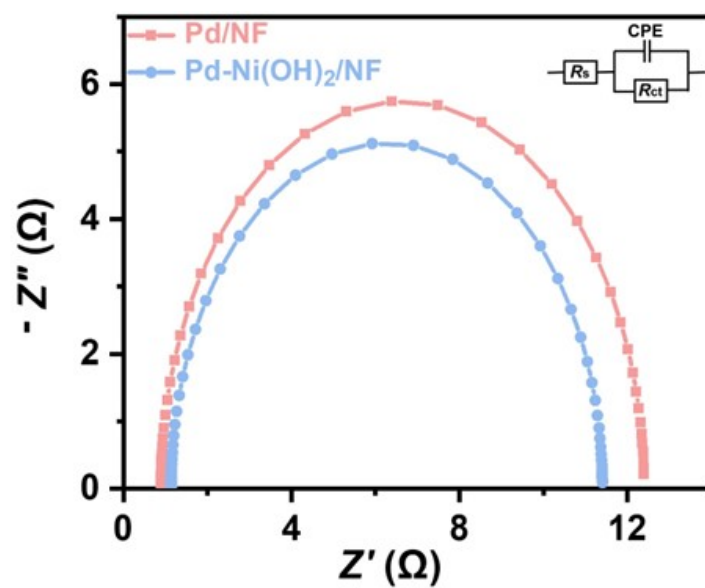

**Figure S8.** Nyquist plots of Pd–Ni(OH)<sub>2</sub>/NF and Pd/NF electrodes at 0.5 V (vs. RHE) in 1 M KOH solution with 0.1 M 1,3-PDO.

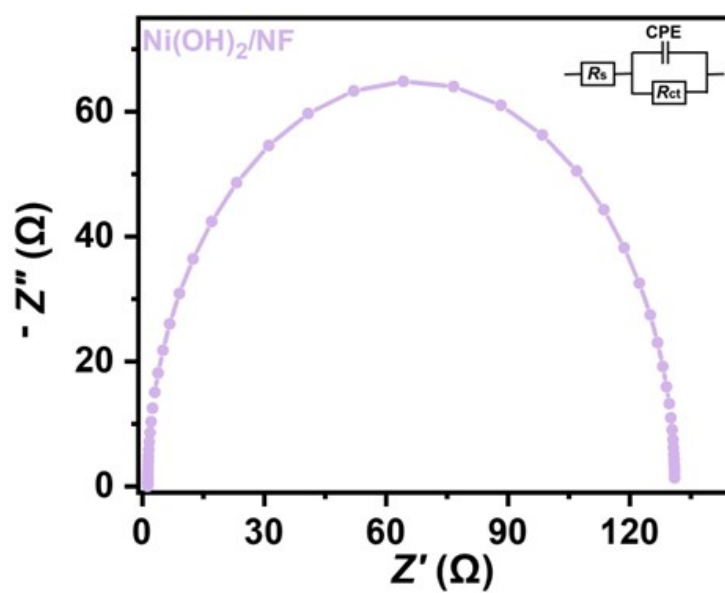

**Figure S9.** Nyquist plots of Ni(OH)<sub>2</sub>/NF electrode at 0.5 V (vs. RHE) in 1 M KOH solution with 0.1 M 1,3-PDO.

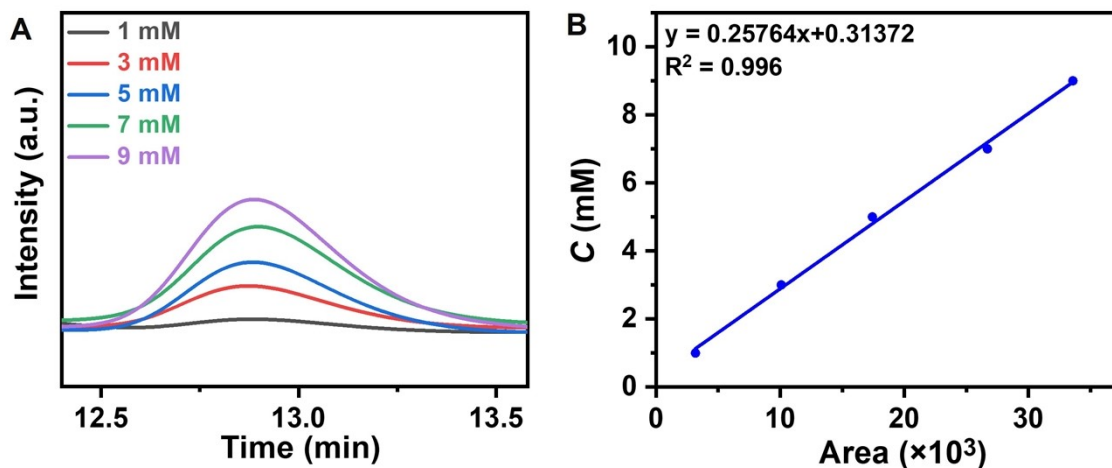

**Figure S10.** (A) Standard HPLC profiles for various concentrations of 3-hydroxypropionic acid; (B) Standard curve of 3-hydroxypropionic acid by correlating the concentration of 3-hydroxypropionic acid with corresponding peak area.

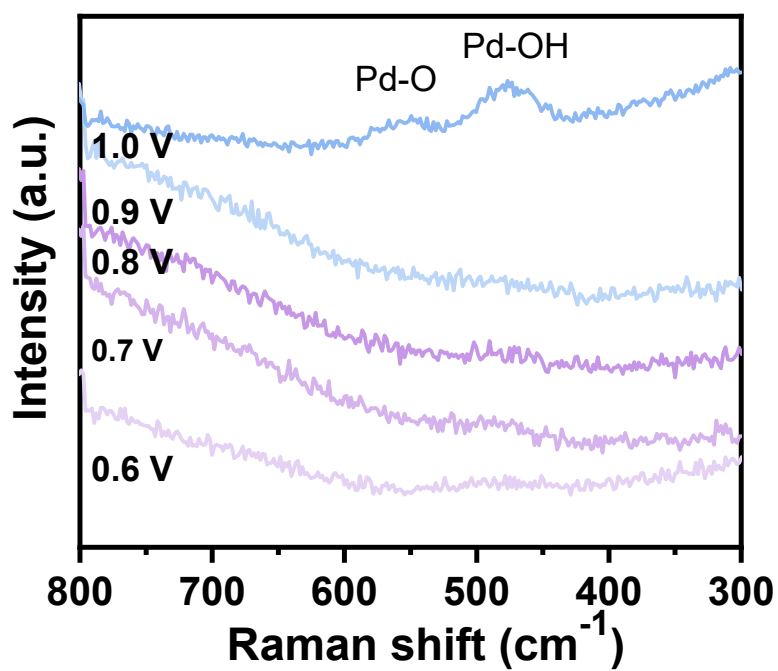

**Figure S11.** In situ Raman spectra of Pd-Ni(OH)<sub>2</sub>/NF collected in 1 M KOH + 1 M EG with increasing potential.

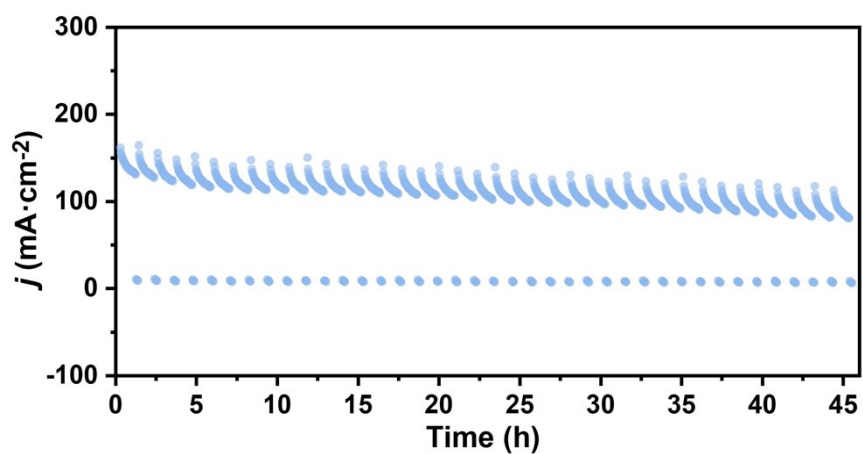

**Figure S12.** Stability tests of intermittent potential (IP) strategy for the Pd-Ni(OH)<sub>2</sub>/NF electrode at 0.9 V (vs. RHE) for POR.

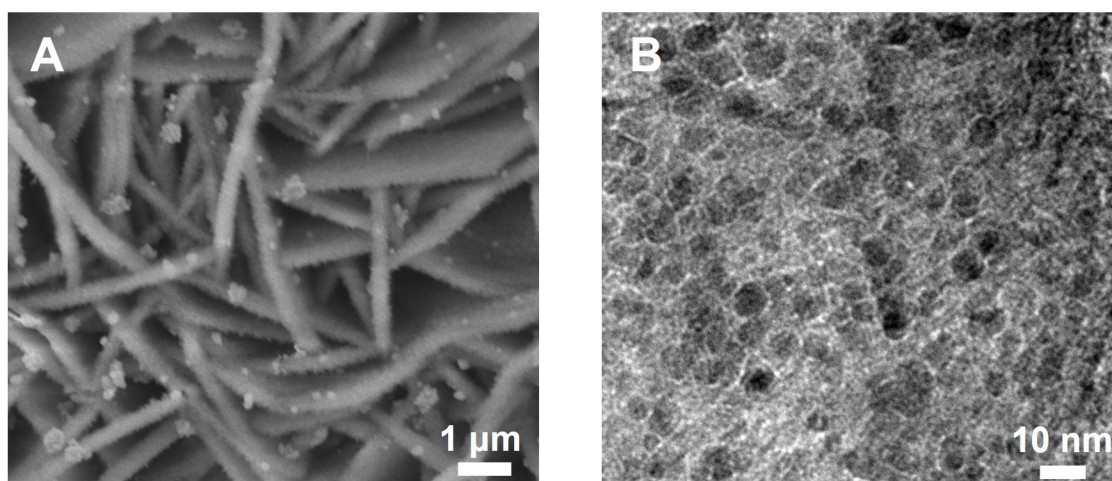

**Figure S13.** (A) SEM and (B) TEM images of Pd-Ni(OH)<sub>2</sub>/NF electrode after POR electrolysis.

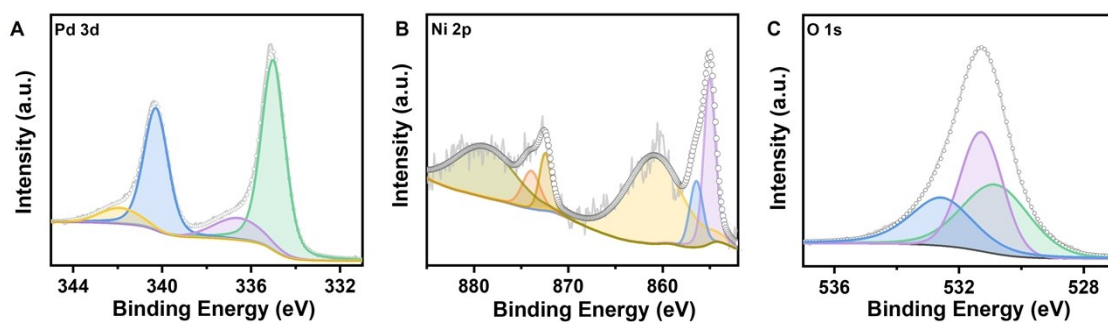

**Figure S14.** XPS spectra of (A) Pd 3d, (B) Ni 2p and (C) O 1s on the Pd-Ni(OH)<sub>2</sub>/NF electrode after POR electrolysis.

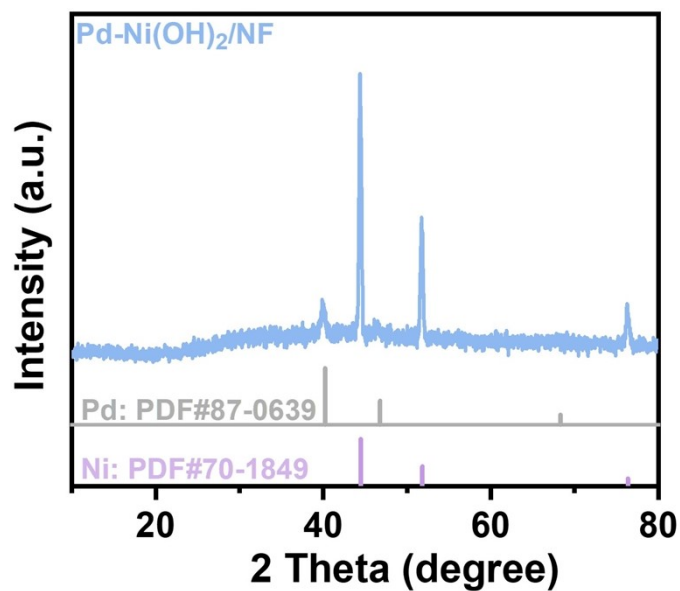

**Figure S15.** XRD pattern of the Pd-Ni(OH)<sub>2</sub>/NF electrode after POR electrolysis.

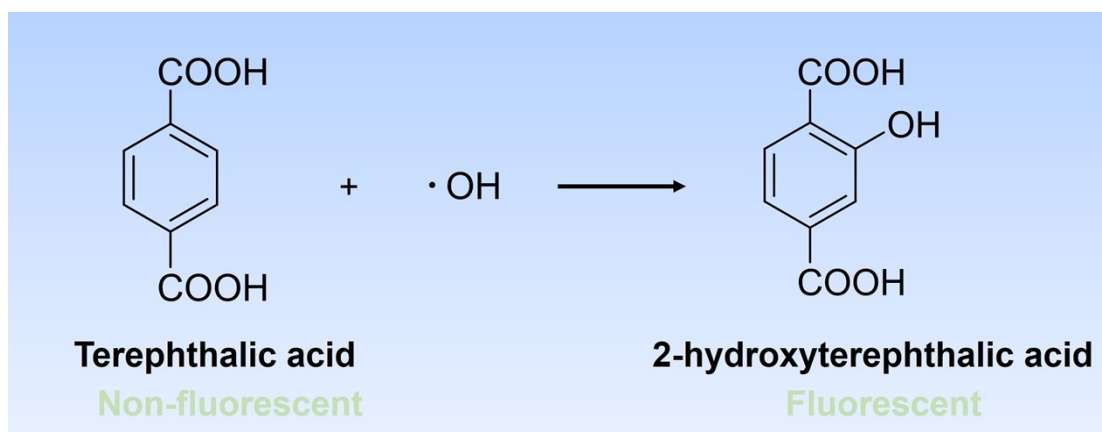

**Figure S16.** Reaction between the as-formed  $\cdot\text{OH}$  and terephthalic acid.

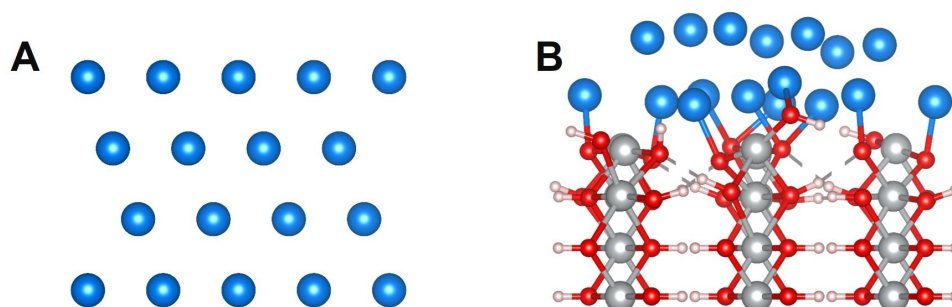

**Figure S17.** Theoretical models of Pd and Pd-Ni(OH)<sub>2</sub>.

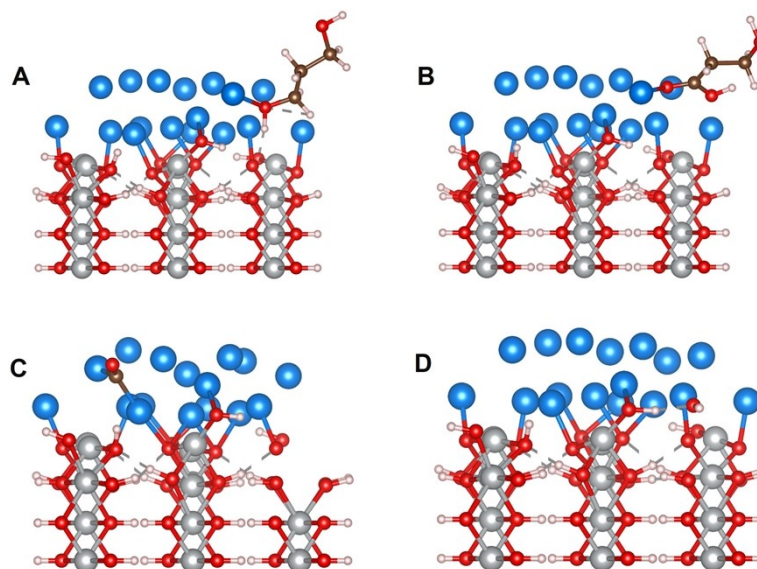

**Figure S18.** Adsorption model of (A) \*1,3-PDO, (B) \*3-HP, (C) \*CO, and (D) \*OH on the Pd-Ni(OH)<sub>2</sub> surface.

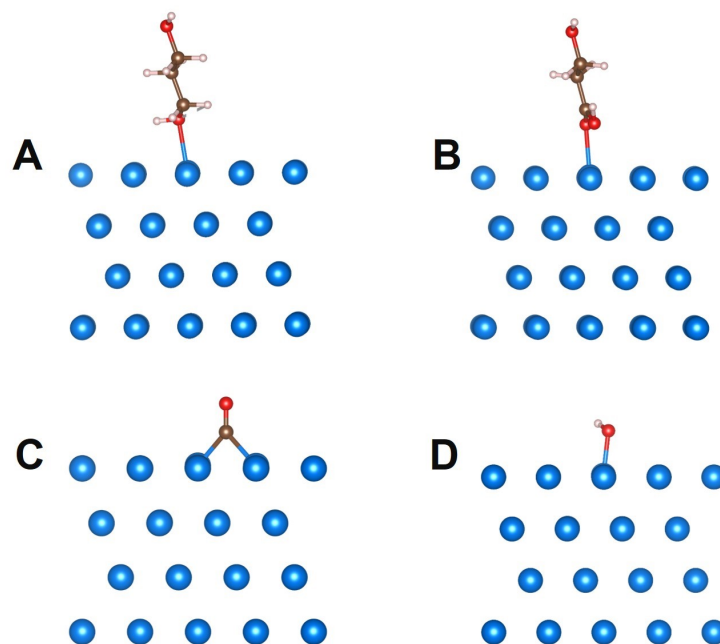

**Figure S19.** Adsorption model of (A) \*1,3-PDO, (B) \*3-HP, (C) \*CO, and (D) \*OH on the Pd surface.

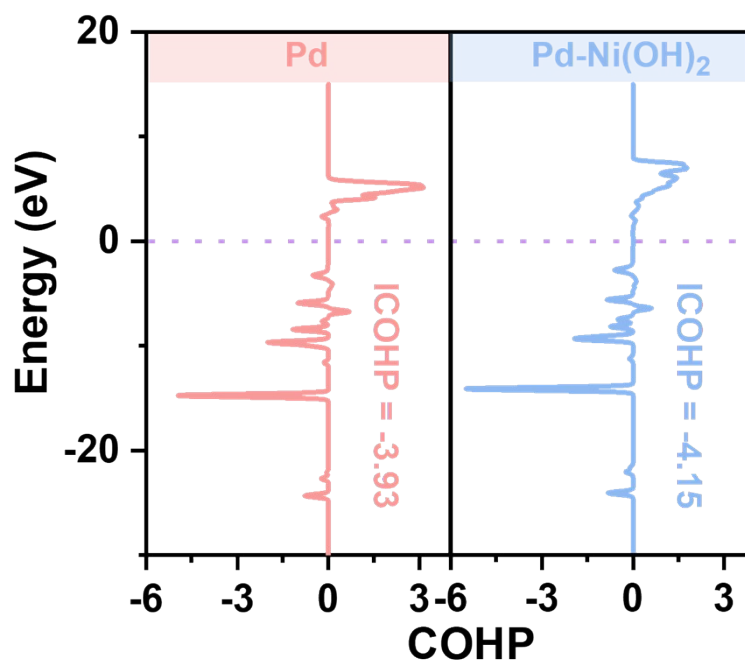

**Figure S20.** C–C bonds in \*HOOC–CH<sub>2</sub>CH<sub>2</sub>OH adsorbed on Pd and Pd–Ni(OH)<sub>2</sub> surfaces.

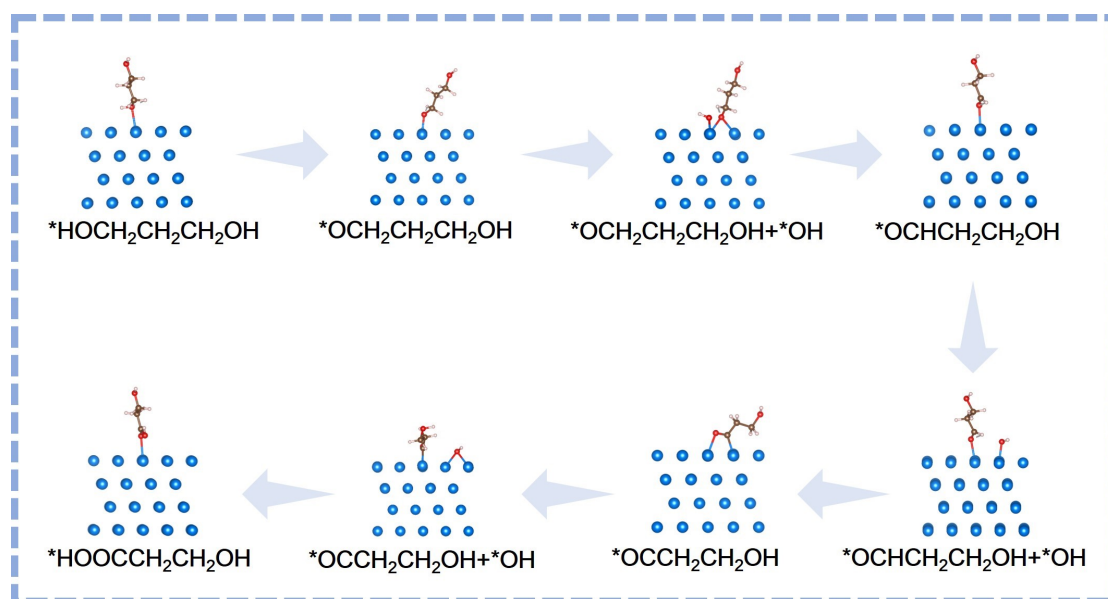

**Figure S21.** Optimized configurations of the 1,3-PDO oxidation process on Pd.

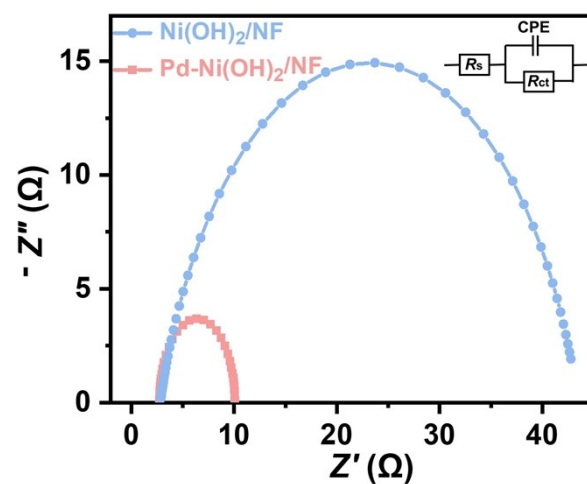

**Figure S22.** Nyquist plots of Pd-Ni(OH)<sub>2</sub>/NF and Ni(OH)<sub>2</sub>/NF electrodes at -0.1 V (vs. RHE) in 1 M KOH solution.

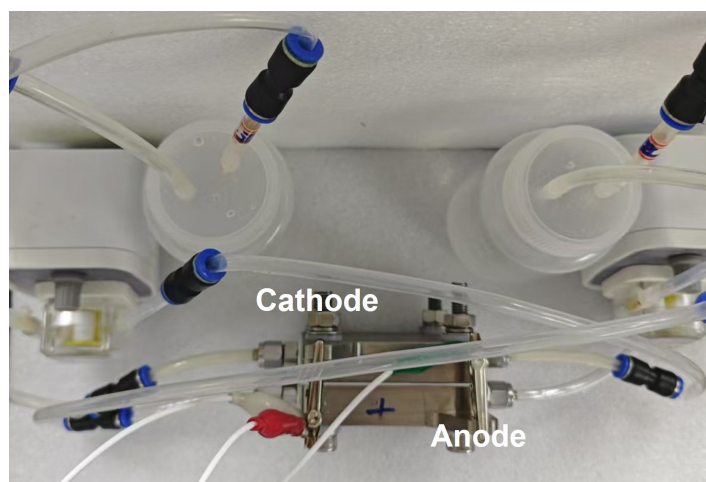

**Figure S23.** Photograph of the MEA system.

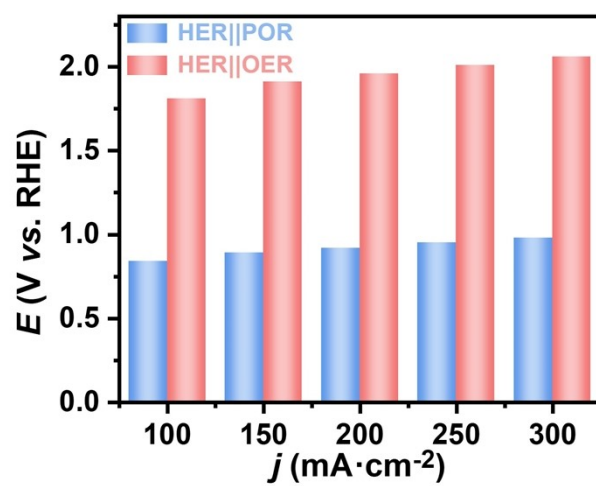

**Figure S24.** Comparisons of the potentials needed to achieve designated current densities for Pd–Ni(OH)<sub>2</sub>/NF in 1.0 M KOH with and without 0.1 M 1,3-PDO.

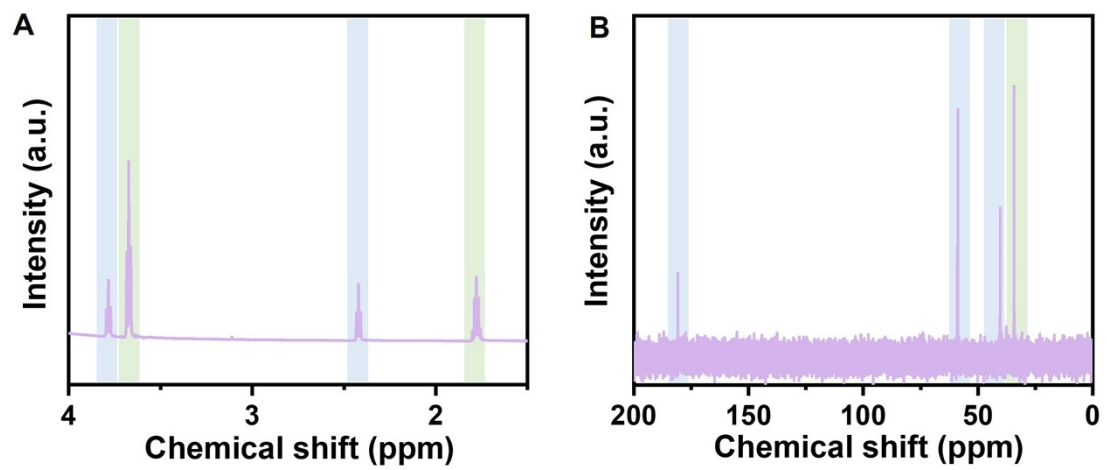

**Figure S25.** (A)  $^1\text{H}$  NMR and (B)  $^{13}\text{C}$  NMR spectra of the electrolyte after electrolysis.

**Table S1.** Comparison of HER performances of the Pd–Ni(OH)<sub>2</sub>/NF electrode and other recently reported electrocatalysts in alkaline solution.

| Electrocatalyst                                       | <i>j</i><br>(mA cm <sup>-2</sup> ) | $\eta$<br>(mV) | Electrolyte | Reference |
|-------------------------------------------------------|------------------------------------|----------------|-------------|-----------|
| Pd–Ni(OH) <sub>2</sub> /NF                            | 10                                 | 50             | 1 M KOH     | This work |
|                                                       | 50                                 | 127            | 1 M KOH     | This work |
|                                                       | 100                                | 168            | 1 M KOH     | This work |
| Ni <sub>2</sub> P–Ni <sub>12</sub> P <sub>5</sub> /NF | 100                                | 182            | 1 M KOH     | 1         |
| RuO <sub>2</sub> –WC NPs                              | 10                                 | 58             | 1 M KOH     | 2         |
| PtSA/Co <sub>AC</sub> <sup>-</sup><br>O@ACTP          | 10                                 | 61             | 1 M KOH     | 3         |
| Rh–MoS <sub>2</sub>                                   | 10                                 | 67             | 1 M KOH     | 4         |
| Pt NWs/SL–<br>Ni(OH) <sub>2</sub>                     | 10                                 | 70             | 1 M KOH     | 5         |
| Ni <sub>5</sub> P <sub>4</sub> NPs                    | 100                                | 210            | 1 M KOH     | 6         |
| Ni–S–Se/NF                                            | 10                                 | 98             | 1 M KOH     | 7         |

### Supplementary references

1. Y. Xu, T. Liu, K. Shi, H. Yu, K. Deng, X. Wang, Z. Wang, L. Wang and H. Wang, *J. Mater. Chem. A*, 2022, **10**, 20365-20374.
2. S.-C. Sun, H. Jiang, Z.-Y. Chen, Q. Chen, M.-Y. Ma, L. Zhen, B. Song and C.-Y. Xu, *Angew. Chem. Int. Ed.*, 2022, **61**, e202202519.
3. J. Zhang, M. Wang, T. Wan, H. Shi, A. Lv, W. Xiao and S. Jiao, *Adv. Mater.*, 2022,

**34**, 2206960.

4. X. Meng, C. Ma, L. Jiang, R. Si, X. Meng, Y. Tu, L. Yu, X. Bao and D. Deng, *Angew. Chem. Int. Ed.*, 2020, **59**, 10502-10507.
5. H. Yin, S. Zhao, K. Zhao, A. Muqsit, H. Tang, L. Chang, H. Zhao, Y. Gao and Z. Tang, *Nat. Commun.*, 2015, **6**, 6430.
6. A. B. Laursen, K. R. Patraju, M. J. Whitaker, M. Retuerto, T. Sarkar, N. Yao, K. V. Ramanujachary, M. Greenblatt and G. C. Dismukes, *Energy Environ. Sci.*, 2015, **8**, 1027-1034.
7. N. Chen, Y.-X. Du, G. Zhang, W.-T. Lu and F.-F. Cao, *Nano Energ.*, 2021, **81**, 105605.
